# Supplementary material
Source: publisher figshare collection journal article supplement (https://diabetesjournals.figshare.com/ndownloader/files/27738105)
Supplement: Supplementary file 1 [file 27738105]

## Supplementary material

**Supplementary Table 1. List of items for the construction of a Frailty Index based on the ADVANCE Study data (N=11140)**

|    | Items                                                 | Scoring                              | Variable name                   | Missing    | Note                                                  |
|----|-------------------------------------------------------|--------------------------------------|---------------------------------|------------|-------------------------------------------------------|
| 1  | HbA1c                                                 | < 8.2%: 0<br>≥ 8.2%: 1               | Recode from HBA1C               | 54 (0.5%)  | Use the cut-off point of 75 <sup>th</sup> percentile. |
| 2  | Currently treated hypertension                        | No: 0<br>Yes: 1                      | HYPER                           | 0          |                                                       |
| 3  | Systolic blood pressure                               | < 157.50 mmHg: 0<br>≥ 157.50 mmHg: 1 | Recode from SBP                 | 1 (0.01%)  | Use the cut-off point of 75 <sup>th</sup> percentile  |
| 4  | Diastolic blood pressure                              | < 87.50 mmHg: 0<br>≥ 87.50 mmHg: 1   | Recode from DBP                 | 1 (0.01%)  | Use the cut-off point of 75 <sup>th</sup> percentile  |
| 5  | Atrial fibrillation                                   | No: 0<br>Yes: 1                      | AF, ECG                         | 13 (0.1%)  | Combine history of AF and ECG                         |
| 6  | Stroke or TIA                                         | No: 0<br>Yes: 1                      | STROKE, TIA                     | 0          | Combine stroke and TIA                                |
| 7  | Heart failure                                         | No: 0<br>Yes: 1                      | HF                              | 0          |                                                       |
| 8  | Chronic kidney disease                                | GFR≥60 ml/min: 0<br>GFR<60 ml/min: 1 | CREATININE, AGE, SEX, WEIGHT    | 47 (0.4%)  | Calculate from creatinine, age, weight, gender        |
| 9  | Hospitalisation due to unstable angina                | No: 0<br>Yes: 1                      | ANGINA                          | 0          |                                                       |
| 10 | Myocardial infarction                                 | No: 0<br>Yes: 1                      | MI                              | 0          |                                                       |
| 11 | CABG/PTCA                                             | No: 0<br>Yes: 1                      | CABG                            | 0          |                                                       |
| 12 | Q wave on ECG                                         | No: 0<br>Yes: 1                      | Q_WAVES                         | 18 (0.2%)  |                                                       |
| 13 | Peripheral revascularisation (angioplasty or surgery) | No: 0<br>Yes: 1                      | REVASC                          | 0          |                                                       |
| 14 | Amputation secondary to vascular disease              | No: 0<br>Yes: 1                      | AMPUTATION                      | 0          |                                                       |
| 15 | Chronic ulceration on leg/foot                        | No: 0<br>Yes: 1                      | Recode from ULCER_L and ULCER_R | 1 (0.01%)  |                                                       |
| 16 | HDL cholesterol                                       | ≥ 1 mmol/l: 0<br>< 1 mmol/l: 1       | HDL_CHOL                        | 14 (0.1%)  | Use the cut-off point of 25 <sup>th</sup> percentile  |
| 17 | LDL cholesterol                                       | < 3.70 mmol/l: 0<br>≥ 3.70 mmol/l: 1 | LDL-CHOL                        | 121 (1.1%) | Use the cut-off point of 75 <sup>th</sup> percentile  |
| 18 | Triglyceride                                          | < 2.30 mmol/l: 0<br>≥ 2.30 mmol/l: 1 | TRIGLYC                         | 15 (0.1%)  | Use the cut-off point of 75 <sup>th</sup> percentile  |

|    |                                                                                                  |                                                                         |                                                 |              |                                                                                    |
|----|--------------------------------------------------------------------------------------------------|-------------------------------------------------------------------------|-------------------------------------------------|--------------|------------------------------------------------------------------------------------|
| 19 | Suspected Dementia                                                                               | No: 0<br>Yes: 1                                                         | DEMENTIA                                        | 1<br>(0.01%) |                                                                                    |
| 20 | Cognition problem based on MMSE                                                                  | MMSE $\geq$ 25: 0<br>MMSE 21-24: 0.5<br>MMSE <21: 1                     | Recode from MMSE                                | 8<br>(0.1%)  |                                                                                    |
| 21 | Blindness                                                                                        | No: 0<br>Yes: 1                                                         | BLINDNESS                                       | 0            |                                                                                    |
| 22 | Other eye problems (Retinal photocoagulation therapy, macular oedema, proliferative retinopathy) | No: 0<br>Yes: 1                                                         | RETINAL, MACULAR_OEDEMA, PROLIF_RETINO          | 0            |                                                                                    |
| 23 | Polypharmacy (use $\geq$ 5 drugs)                                                                | No: 0<br>Yes: 1                                                         | Variables related to medications                | 0            | We calculate the total number of medications and choose the cut point of 5         |
| 24 | Underweight                                                                                      | No: 0<br>Yes: 1                                                         | Recode from BMI                                 | 4<br>(0.04%) | Recode from BMI <18.5                                                              |
| 25 | High waist circumference                                                                         | No: 0<br>Yes: 1                                                         | Recode WAIST                                    | 6<br>(0.1%)  | Defined as: Waist Cx $\geq$ 102 in men, $\geq$ 88 in women                         |
| 26 | Sedentary                                                                                        | No: 0<br>Yes: 1                                                         | Recode from EXERCISE_MILD=0 and EXERCISE_MODR=0 | 0            | Defined as the number of times spent for moderate and mild exercise last week =“0” |
| 27 | Need help with everyday activities                                                               | No: 0<br>Yes: 1                                                         | HELP                                            | 0            |                                                                                    |
| 28 | Currently drink alcohol once a week or more                                                      | No: 0<br>Yes: 1                                                         | CURR_DRINKER                                    | 0            |                                                                                    |
| 29 | EQ5D Mobility: problems in walking about                                                         | Have no problem: 0<br>Have some problem: 0.5<br>Unable to walk: 1       | MOBILITY                                        | 59 (0.5%)    |                                                                                    |
| 30 | EQ5D Self-care: problems with washing or dressing                                                | Have no problem: 0<br>Have some problem: 0.5<br>Unable to wash/dress: 1 | PERSONAL_CARE                                   | 59 (0.5%)    |                                                                                    |
| 31 | EQ5D Usual Activities: problems doing usual activities                                           | Have no problem: 0<br>Have some problem: 0.5<br>Unable to do: 1         | ACTIVITIES                                      | 59 (0.5%)    |                                                                                    |
| 32 | EQ5D Pain/Discomfort:                                                                            | No pain/discomfort: 0                                                   | PAIN                                            | 59 (0.5%)    |                                                                                    |

|    |                         |                                                                                                     |                          |           |                                                                           |
|----|-------------------------|-----------------------------------------------------------------------------------------------------|--------------------------|-----------|---------------------------------------------------------------------------|
|    |                         | Some pain/discomfort: 0.5<br>Extreme pain/discomfort: 1                                             |                          |           |                                                                           |
| 33 | EQ5D Anxiety/Depression | No anxiety/depression: 0<br>Anxiety/depression to some extent: 0.5<br>Extreme anxiety/depression: 1 | ANXIETY                  | 59 (0.5%) |                                                                           |
| 34 | Poor self-rated health  | No: 0<br>Yes: 1                                                                                     | Recode from HEALTH_SCALE | 62 (0.6%) | Use the cut point of the lowest 25th of the self-rated health scale (<70) |

All 34 variables were present in 10828 participants, missingness occurred in 312 participants (Missing 1 variable: 208 participants; Missing 2 variables: 39 participants; Missing 3 variables: 5 participants; Missing 4 variables: 1 participant; Missing 6 variables: 58 participants; Missing 8 variables: 1 participant)

**Supplementary Table 2. Unadjusted rates (95% CI) per 1000 person years for outcomes in ADVANCE study participants by glucose intervention**

| Events                                          | Intensive glucose control group (n=5571) | Standard control group (n=5569) | P-value |
|-------------------------------------------------|------------------------------------------|---------------------------------|---------|
| <b>Primary study outcomes:</b>                  |                                          |                                 |         |
| Combined macrovascular and microvascular events | 40.49 (38.06, 43.06)                     | 45.09 (42.52, 47.81)            | 0.013   |
| Microvascular events                            | 20.50 (18.82, 22.33)                     | 23.70 (21.89, 25.67)            | 0.015   |
| Macrovascular events                            | 21.51 (19.79, 23.37)                     | 22.81 (21.04, 24.73)            | 0.319   |
| <b>Secondary study outcomes:</b>                |                                          |                                 |         |
| All-cause mortality                             | 18.62 (17.05, 20.32)                     | 19.92 (18.30, 21.68)            | 0.278   |
| Cardiovascular mortality                        | 9.48 (8.38, 10.72)                       | 10.82 (9.64, 12.14)             | 0.123   |
| Severe hypoglycaemia                            | 5.67 (4.83, 6.66)                        | 3.05 (2.46, 3.80)               | <0.001  |

**Supplementary Table 3. Unadjusted rates (95% CI) per 1000 person years for outcomes in ADVANCE study participants by blood pressure lowering treatment**

| Events                                          | BP lowering treatment<br>(n=5569) | Placebo<br>(n=5571)  | P-value |
|-------------------------------------------------|-----------------------------------|----------------------|---------|
| <b>Primary study outcomes:</b>                  |                                   |                      |         |
| Combined macrovascular and microvascular events | 38.13 (35.67, 40.77)              | 41.98 (39.38, 44.75) | 0.042   |
| Microvascular events                            | 18.95 (17.26, 20.81)              | 20.77 (18.99, 22.72) | 0.165   |
| Macrovascular events                            | 20.58 (18.81, 22.50)              | 22.47 (20.62, 24.49) | 0.163   |
| <b>Secondary study outcomes:</b>                |                                   |                      |         |
| All-cause mortality                             | 17.00 (15.42, 18.73)              | 19.75 (18.04, 21.62) | 0.026   |
| Cardiovascular mortality                        | 8.81 (7.69, 10.08)                | 10.80 (9.56, 12.20)  | 0.028   |

**Supplementary Table 4: Subgroup analysis on the effect of frailty on outcomes, by age group**

| <b>Outcome &amp; subgroup</b>                         | <b>HR (95%CI)</b> | <b>P value for interaction</b> |
|-------------------------------------------------------|-------------------|--------------------------------|
| <i>Combined major macrovascular and microvascular</i> |                   |                                |
| <65 years                                             | 1.61 (1.39, 1.87) | 0.001                          |
| ≥65 years                                             | 2.16 (1.93, 2.41) |                                |
| <i>All-cause mortality</i>                            |                   |                                |
| <65 years                                             | 2.47 (1.90, 3.20) | 0.629                          |
| ≥65 years                                             | 2.30 (2.00, 2.64) |                                |
| <i>Severe hypoglycaemia</i>                           |                   |                                |
| <65 years                                             | 1.23 (0.71, 2.14) | 0.215                          |
| ≥65 years                                             | 1.82 (1.33, 2.49) |                                |

**Supplementary Table 5: Subgroup analysis for the association of randomised treatments on outcomes by age group in frail and non-frail participants**

| Outcome & subgroup                                    | Frail              |                         | Not frail         |                         | Comparison                    |
|-------------------------------------------------------|--------------------|-------------------------|-------------------|-------------------------|-------------------------------|
|                                                       | HR (95%CI)         | P value for interaction | HR (95%CI)        | P value for interaction | P value for 3-way interaction |
| <b>Intensive glucose control vs standard control</b>  |                    |                         |                   |                         |                               |
| <i>Combined major macrovascular and microvascular</i> |                    |                         |                   |                         |                               |
| <65 years                                             | 1.14 (0.90, 1.45)  | 0.308                   | 0.74 (0.62, 0.88) | 0.079                   | 0.062                         |
| ≥65 years                                             | 0.98 (0.83, 1.17)  |                         | 0.91 (0.79, 1.04) |                         |                               |
| <i>All-cause mortality</i>                            |                    |                         |                   |                         |                               |
| <65 years                                             | 1.01 (0.69, 1.47)  | 0.507                   | 0.87 (0.61, 1.24) | 0.767                   | 0.492                         |
| ≥65 years                                             | 1.17 (0.94, 1.45)  |                         | 0.82 (0.68, 0.99) |                         |                               |
| <i>Severe hypoglycaemia</i>                           |                    |                         |                   |                         |                               |
| <65 years                                             | 8.10 (1.86, 35.24) | 0.049                   | 2.65 (1.37, 5.15) | 0.127                   | 0.277                         |
| ≥65 years                                             | 1.71 (1.03, 2.85)  |                         | 1.46 (0.99, 2.15) |                         |                               |
| <b>Blood pressure lowering treatment vs placebo</b>   |                    |                         |                   |                         |                               |
| <i>Combined major macrovascular and microvascular</i> |                    |                         |                   |                         |                               |
| <65 years                                             | 0.90 (0.70, 1.17)  | 0.541                   | 0.96 (0.80, 1.16) | 0.166                   | 0.182                         |
| ≥65 years                                             | 1.00 (0.83, 1.20)  |                         | 0.81 (0.70, 0.94) |                         |                               |
| <i>All-cause mortality</i>                            |                    |                         |                   |                         |                               |
| <65 years                                             | 0.91 (0.61, 1.36)  | 0.869                   | 0.87 (0.59, 1.30) | 0.548                   | 0.590                         |
| ≥65 years                                             | 0.94 (0.75, 1.19)  |                         | 0.76 (0.62, 0.93) |                         |                               |

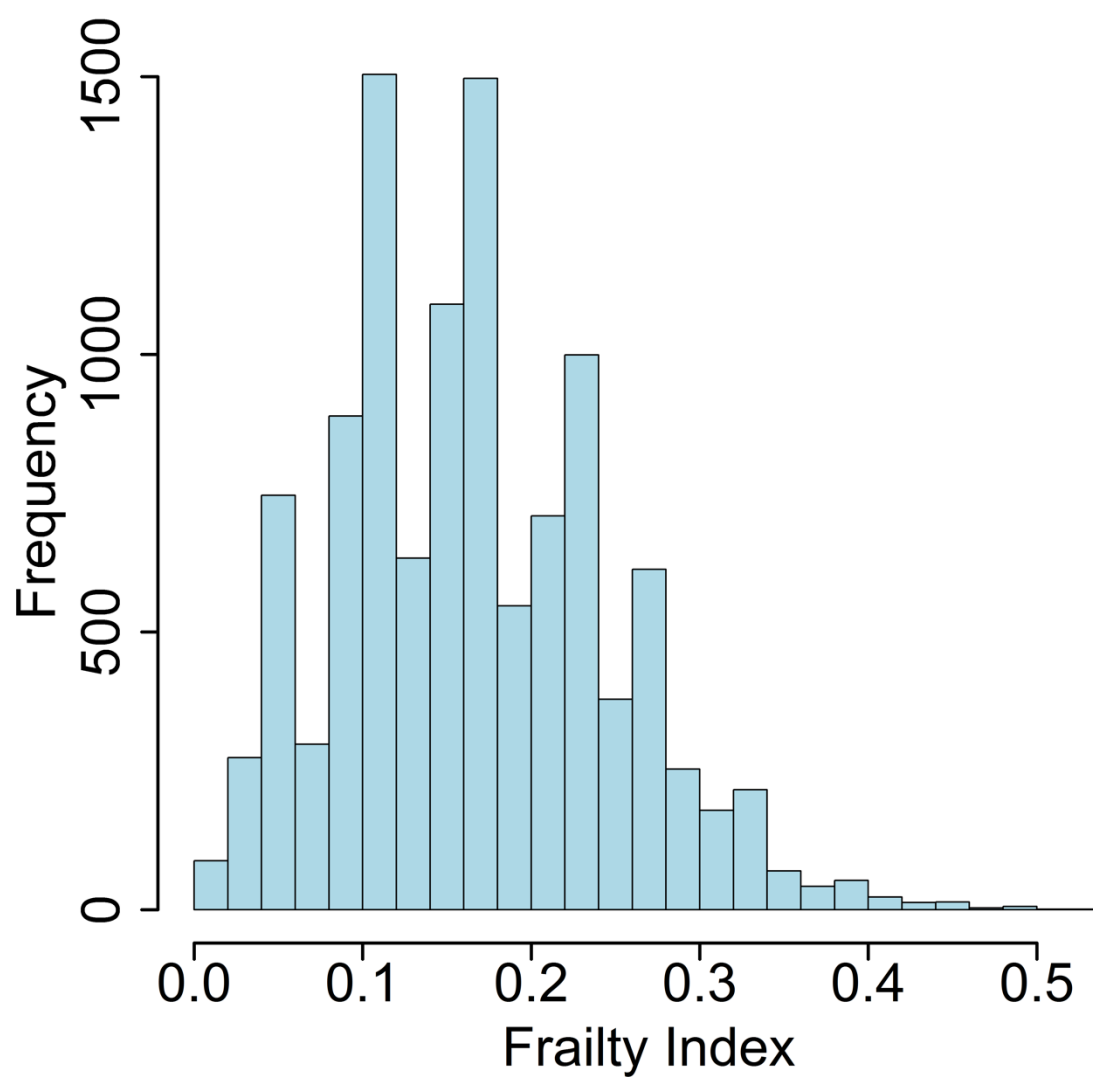

**Supplementary Figure 1. The distribution of the Frailty Index in participants of the ADVANCE Trial**



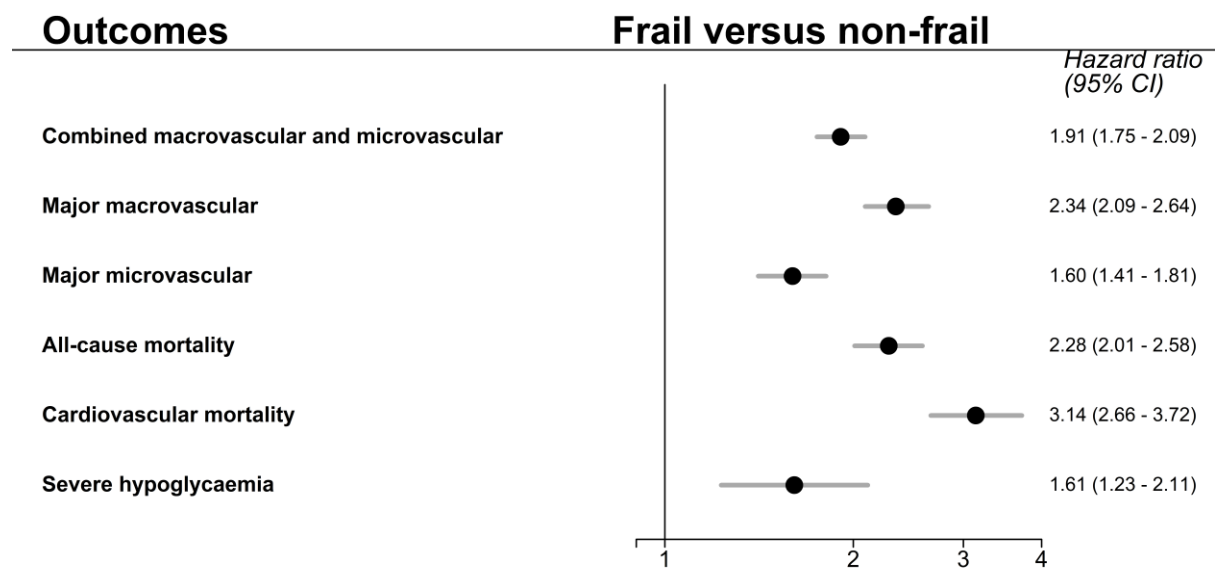

**Supplementary Figure 2. The unadjusted hazard ratios of frailty (frail versus non-frail) on the study outcomes (all treatment groups combined)**
